# Supplementary material
Source: Research Square preprint supplement (doi:10.21203/rs.3.rs-9593240/v1)
Supplement: Supplementary file 1 [file 831fc6378bfbf05055e5ea93.docx]

**STROBE Statement — Checklist of Items for Cross-Sectional Studies**

**Manuscript: Testing a Structural Equation Model Explaining Adherence to Pressure Injury Prevention: The Role of Knowledge, Attitude, and Practice**

| **Section/Topic** | **No.** | **STROBE Recommendation** | **Location in Manuscript** | **Reported** |
| --- | --- | --- | --- | --- |
| **TITLE AND ABSTRACT** | | | | |
| **Title & Abstract** | **1a** | Indicate the study's design with a commonly used term in the title or the abstract. | Title: Testing a Structural Equation Model Explaining Adherence to Pressure Injury Prevention: The Role of Knowledge, Attitude, and Practice'; Abstract Methods: A cross-sectional analytical design was conducted among 418 RNs… | **Yes** |
|  | **1b** | Provide in the abstract an informative and balanced summary of what was done and what was found. | Abstract (Background/Objectives, Methods, Results, Conclusions): reports setting (PSMMC, N=418 RNs), instruments (PUKAT-2.0, APuP, practice scale, QARPPU), SEM method, fit indices (χ²/df=1.98, RMSEA=.048, CFI=.877), key structural paths (β Practice to Adherence=.81), bootstrapped indirect effects (5,000 resamples), and conclusions. | **Yes** |
| **INTRODUCTION** | | | | |
| **Background/Rationale** | **2** | Explain the scientific background and rationale for the investigation being reported. | Section 1 (Introduction), paragraphs 1–5: epidemiology of PIs globally and in Saudi Arabia (prevalence 44.4%, incidence 38.6% in tertiary care), economic burden (USD 26B in USA), role of RNs as frontline prevention agents, KAP framework, limitations of prior regression-based studies, and identified gap in SEM application to PI prevention adherence. | **Yes** |
| **Objectives** | **3** | State specific objectives, including any pre-specified hypotheses. | Section 1 (Introduction), final paragraph: three formal objectives stated(1) psychometric validation of instruments, (2) test SEM with direct and indirect pathways, (3) evaluate model adequacy. Six directional hypotheses pre-specified (Knowledge to Attitude , Knowledge to Practice , Attitude to Practice , Practice to Adherence, Attitude to Adherence, Knowledge to Adherence via Attitude and Practice ). Conceptual model presented as Figure 1. | **Yes** |
| **METHODS** | | | | |
| **Study Design** | **4** | Present key elements of study design early in the paper. | Section 2.1: This study employed a quantitative, cross-sectional design incorporating SEM.' Rationale for SEM over regression stated. STROBE compliance noted. Design described in Abstract Methods section. | **Yes** |
| **Setting** | **5** | Describe the setting, locations, and relevant dates, including periods of recruitment, exposure, follow-up, and data collection. | Section 2.2: PSMMC, Riyadh, Saudi Arabia; 1,279-bed tertiary referral institution; 53 inpatient and emergency nursing units; acute medical-surgical, critical care, and specialty settings. Section 2.7: Data collected during 'a defined period' using online surveys during scheduled shifts. IRB approval dated 15 March 2026 (Sections 2.8). Note: Exact data collection start/end dates not explicitly stated in the manuscript body. | **Yes** |
| **Participants** | **6a** | Give the eligibility criteria, and the sources and methods of selection of participants. | Section 2.3: Inclusion, RNs in direct bedside care with ≥1 year full-time clinical experience. Exclusion, exclusively administrative/non-clinical roles; absent throughout entire data collection window due to sanctioned leave or illness. Section 2.5: Consecutive convenience sampling from all 53 designated units; all eligible RNs approached sequentially during scheduled shifts. Section 3.1: Flow diagram,432 assessed, 14 excluded (administrative roles, absent throughout collection, student/intern status), 418 included. | **Yes** |
| **Variables** | **7** | Clearly define all outcomes, exposures, predictors, potential confounders, and effect modifiers. Give diagnostic criteria, if applicable. | Section 1 (Introduction): KAP constructs theoretically defined within KAP framework, Knowledge (cognitive dimension: PI etiology, risk stratification, prevention strategies), Attitude (affective/evaluative dimension: beliefs, perceived importance, perceived barriers), Practice (behavioral dimension: frequency and fidelity of preventive activities), Adherence (compliance with evidence-based PIP recommendations, QARPPU). Section 2.6: Instruments operationalize each construct. Section 2.9: Sociodemographic variables listed (gender, age, education, experience, clinical unit, PI education/certification). | **Yes** |
| **Data Sources / Measurement** | **8** | For each variable of interest, give sources of data and details of methods of assessment (measurement). Describe comparability of assessment methods if there is more than one group. | Section 2.6: Five instruments described with psychometric properties—(1) Sociodemographic questionnaire (author-developed); (2) PUKAT 2.0 (25-item MCQ, ICC=0.69; Manderlier et al.); (3) APuP (13-item, 4-point Likert, α=0.79; Beeckman et al.); (4) Thomas & Nain practice scale (22-item, 5-point Likert, α=0.89); (5) QARPPU (18-item, 5-point Likert + 2 vignettes, α=0.89; Moya-Suárez et al.). All instruments used in English (justified by English-proficient expatriate RN population). Permission obtained from copyright holders. | **Yes** |
| **Bias** | **9** | Describe any efforts to address potential sources of bias. | Section 2.5: Consecutive unit-wide sampling to minimize selection bias; 100% response rate with no non-response. Section 2.7: Standardized verbal explanation; privacy during completion; no supervisory observation; double-entry data verification. Section 4.7 (Limitations): Social desirability bias acknowledged despite anonymity guarantee. Self-report practice/adherence acknowledged as limitation vs. observed compliance. | **Yes** |
| **Study Size** | **10** | Explain how the study size was arrived at. | Section 2.4: A priori G*Power calculation (f²=0.15, α=.05, power=0.80, 3 predictors) → minimum n=77. Supplemented by SEM-specific guideline of n≥200 (Kline; Hair et al.). Conservative recruitment target set above 200 threshold. Final n=418, satisfying multiple convergent criteria. References [25–29]. | **Yes** |
| **Quantitative Variables** | **11** | Explain how quantitative variables were handled in the analyses. If applicable, describe which groupings were chosen and why. | Section 2.9: Composite total scores used for each instrument (sum of item responses). Continuous variables retained as continuous in SEM. Normality assessed via skewness (<2) and kurtosis (<7) thresholds—all met (Table 1). Pearson correlation used given normality assumption met. No grouping or categorization of continuous variables performed. | **Yes** |
| **Statistical Methods** | **12a** | (a) Describe all statistical methods, including those used to control for confounding. | Section 2.9: IBM SPSS v31.0 for descriptive statistics (means, SDs, frequencies, percentages), normality testing (skewness/kurtosis), and Pearson correlations. IBM AMOS v31.0 for CFA (each instrument independently) and SEM (maximum likelihood estimation). Psychometric benchmarks stated (loadings ≥.50, AVE ≥.50, CR ≥.70, HTMT <.85). Bootstrapped indirect effects (5,000 iterations, 95% BCCI). Model fit: χ²/df ≤3.0, RMSEA <.08, CFI/TLI ≥.90, SRMR <.08, GFI ≥.90, AGFI ≥.85. AIC/BIC/Δχ² for model comparison. | **Yes** |
|  | **12b** | (b) Describe any methods used to examine subgroups and interactions. | No subgroup or interaction analyses were conducted. The study examined the full sample (N=418) as a single analytical unit. Sociodemographic covariates (age, experience) held constant in conceptual model (Figure 1 legend) but not modeled as moderators. | **NA** |
|  | **12c** | (c) Explain how missing data were addressed. | Section 2.5: 100% response rate achieved; no questionnaires had missing items due to supervised online data collection. Section 2.7: 'All questionnaires were fully completed, yielding a final sample free of missing data.' Section 2.9: Little's MCAR test conducted as part of preliminary procedures. | **Yes** |
|  | **12d** | (d) If applicable, describe analytical methods taking account of sampling strategy. | Section 2.5: Consecutive convenience sampling documented. Section 2.9: Standard CFA/SEM methods applied. No complex survey weighting required given the consecutive, exhaustive unit-wide approach. | **Yes** |
|  | **12e** | (e) Describe any sensitivity analyses. | Section 3.10: Nested model sensitivity analysis conducted to investigate suppression effect, attitude to adherence path tested with and without practice in the model. Confirmed classical suppression: without practice, attitude to adherence was positive and significant (β=.41, p<.001); with practice, path reversed (β=−.58). | **Yes** |
| **RESULTS** | | | | |
| **Participants** | **13a** | (a) Report numbers of individuals at each stage of study. | Section 3.1 (Recruitment Flow Diagram): 432 RNs initially assessed for eligibility across 53 inpatient/emergency units; 14 excluded; 418 completed the survey electronically via Google Forms and included in final analysis. | **Yes** |
|  | **13b** | (b) Give reasons for non-participation at each stage. | Section 3.1: 14 excluded due to: administrative or non-clinical roles; absent throughout entire data collection period; student/intern status without full registration. | **Yes** |
|  | **13c** | (c) Consider use of a flow diagram. | Section 3.1: STROBE-compliant recruitment flow diagram presented as Figure 2 (referenced in manuscript; developed by first author). Flow diagram included as supplementary material. | **Yes** |
| **Descriptive Data** | **14a** | (a) Give characteristics of study participants (e.g., demographic, clinical, social) and information on exposures and potential confounders. | Section 3.2 and Table 1: Gender (86.6% female), age (mean 36.89±7.69 years), clinical experience (mean 12.18±5.65 years), ethnicity (Filipino 45.2%, Indian 43.5%, Arabian 5.7%, other 5.5%), education (Bachelor's 68.2%, Diploma 17.0%, Master's 14.8%), clinical unit (critical care 52.2%, acute care 47.8%), PI formal education (5.3% yes), PI certification (90.2% yes), recency of PI reading (<1 year: 68.9%). Construct means, SDs, ranges, skewness, and kurtosis reported. | **Yes** |
|  | **14b** | (b) Indicate number of participants with missing data for each variable of interest. | Section 2.5, 2.7, and 3.2: No missing data for any variable. 100% response rate with complete datasets. Table 1 presents full N=418 for all variables. | **Yes** |
| **Outcome Data** | **15** | Report numbers of outcome events or summary measures. | Section 3.2 and Table 1: Adherence (QARPPU) summary statistics reported—Mean=61.19, SD=18.31, Range=27–90, Skewness=−0.21, Kurtosis=−1.12. Section 3.9: Structural path to adherence (Practice β=.81, Attitude β=−.58, Knowledge β=.08 [ns]). Section 3.8: Model fit indices. Table 9 presents full fit statistics. | **Yes** |
| **Main Results** | **16a** | (a) Give unadjusted estimates and, if applicable, confounder-adjusted estimates and their precision (e.g., 95% confidence interval). | Table 3: Pearson zero-order correlations (unadjusted) among Knowledge, Attitude, Practice, Adherence (all p<.001). Section 3.9 and Figure 2: Standardized structural path coefficients (β) from SEM with 95% BCCIs for indirect effects—Knowledge to Adherence via Practice: β=.53 [.44,.62]; sequential pathway Knowledge to Attitude to Practice to Adherence: β=.21 [.15,.28]. | **Yes** |
|  | **16b** | (b) Report category boundaries when continuous variables were categorized. | No continuous variables were categorized in this study. All constructs remain as continuous composite scores in the SEM framework. | **NA** |
|  | **16c** | (c) If relevant, consider translating estimates of relative risk into absolute risk for a meaningful time period. | Not applicable. Study uses structural path coefficients (standardized β) rather than relative risk estimates. Cross-sectional SEM design does not lend itself to risk translation. | **NA** |
| **Other Analyses** | **17** | Report other analyses done—e.g., analyses of subgroups and interactions, and sensitivity analyses. | Section 3.5 (EFA): Kaiser–Meyer–Olkin (KMO=.97), Bartlett's test (χ²=25,270.03, p<.001), PAF with oblimin rotation—4-factor solution explaining 57.87% variance (Table 5). Section 3.6: Inter-item correlations by scale (Table 6). Section 3.7: Construct validity—CR, AVE, HTMT matrix (Table 7). Section 3.10: Suppression diagnostics—nested model testing attitude to adherence with/without practice. | **Yes** |
| **DISCUSSION** | | | | |
| **Key Results** | **18** | Summarise key results with reference to study objectives. | Section 4.1 (Key Findings): Summarizes that (1) adherence is primarily driven by preventive practice; (2) all directional hypotheses formally evaluated within SEM—Knowledge to Attitude , Knowledge to Practice , Attitude to Practice , Practice to Adherence supported; direct Attitude to Adherence not supported (suppression); (3) sequential mediation confirmed; (4) bivariate correlations strongest for Attitude–Practice (r=.70), then K–Practice (r=.65). Results linked back to three pre-specified study objectives. | **Yes** |
| **Limitations** | **19** | Discuss limitations of the study, taking into account sources of potential bias or imprecision. Discuss both direction and magnitude of any potential bias. | Section 4.7: Five limitations stated—(1) cross-sectional design precludes causal inference; (2) single-site military tertiary hospital limits generalizability; (3) self-reported practice/adherence introduces social desirability bias (direction: likely overestimation); (4) composite total scores vs. item-level SEM introduces measurement imprecision; (5) marginally sub-threshold NFI/RFI due to known sensitivity limitations of legacy fit indices in large models. | **Yes** |
| **Interpretation** | **20** | Give a cautious overall interpretation of results considering objectives, limitations, multiplicity of analyses, results from similar studies, and other relevant evidence. | Sections 4.2–4.6 and 5 (Conclusions): Cautious interpretation provided—CFI/TLI below .90 threshold acknowledged; RMSEA and PCLOSE used as primary fit evidence. Suppression effect contextualized as statistical artifact. Findings compared to Turkish ICU study (Yilmaz & Gürlek Kisacik, n=302), Chinese multicenter study (Li et al., n=17,253), Saudi multicenter PUKAT 2.0 study (Guerrero et al., n=320). Conclusions explicitly qualified by cross-sectional design limitations. | **Yes** |
| **Generalisability** | **21** | Discuss the generalisability (external validity) of the study results. | Section 4.7 (Limitation 2): Single-site sampling within one tertiary military medical city in Riyadh constrains generalizability across institutional, geographic, and cultural contexts. Section 4.9 (Future Directions): Multicenter replication across tertiary, community, and long-term care settings within Saudi Arabia and MENA region recommended, with measurement invariance testing before assuming generalizability. | **Yes** |
| **OTHER INFORMATION** | | | | |
| **Funding** | **22** | Give the source of funding and the role of the funders for the present study and, if applicable, for the original study on which the present article is based. | Funding section: 'This study did not receive funding.' Acknowledgments section: 'The authors express gratitude to the Deanship of Scientific Research at King Saud University in Riyadh, Saudi Arabia.' Conflicts of Interest: 'The authors declare no conflict of interest.' | **Yes** |

**Notes:**

Yes = Item reported as recommended by STROBE guidelines.

NA = Item not applicable to this study (e.g., no subgroup analyses, no continuous variable categorization, no risk ratios).

* Items marked with asterisk (*) in original STROBE checklist require information to be given separately for exposed/unexposed groups — not applicable to this single-group SEM study.

***Reference: Vandenbroucke JP, et al. (2007). Strengthening the Reporting of Observational Studies in Epidemiology (STROBE): explanation and elaboration. Epidemiology, 18(6):805–835.***
